# Supplementary material for: Synthesis of g-C3N4 nanosheet/Au@Ag nanoparticle hybrids as SERS probes for cancer cell diagnostics
Source: Royal Society of Chemistry journal article supplement (doi:10.1039/c5ra16558j), 2015-01-01
Supplement: c5ra16558j1.pdf [file c5ra16558j1.pdf]

## Electronic Supplementary Information

### Synthesis of g-C<sub>3</sub>N<sub>4</sub> Nanosheets/Au@Ag Nanoparticles

### Hybrids as SERS Probe for Cancer Cells Diagnostics

Jianping Wang,<sup>a,b</sup> Renyong Liu,<sup>a</sup> Cheng Zhang,<sup>a,b</sup> Guangmei Han,<sup>a</sup> Jun Zhao,<sup>a</sup> Bianhua Liu,<sup>\*,a</sup> Changlong Jiang<sup>\*,a</sup> and Zhongping Zhang<sup>a,c</sup>

<sup>a</sup> Institute of Intelligent Machines, Chinese Academy of Sciences, Hefei, Anhui, 230031, China. E-mail: [cljiang@iim.ac.cn](mailto:cljiang@iim.ac.cn), [bhliu@iim.ac.cn](mailto:bhliu@iim.ac.cn).

<sup>b</sup> Department of Chemistry, University of Science & Technology of China, Hefei, Anhui, 230026, China.

<sup>c</sup> State Key Laboratory of Transducer Technology Chinese Academy of Sciences, Hefei, Anhui, 230031, China.

Corresponding Author:

Changlong Jiang and Bianhua Liu

\*E-mail: [cljiang@iim.ac.cn](mailto:cljiang@iim.ac.cn); [bhliu@iim.ac.cn](mailto:bhliu@iim.ac.cn).

Tel.: +86-551-65591156

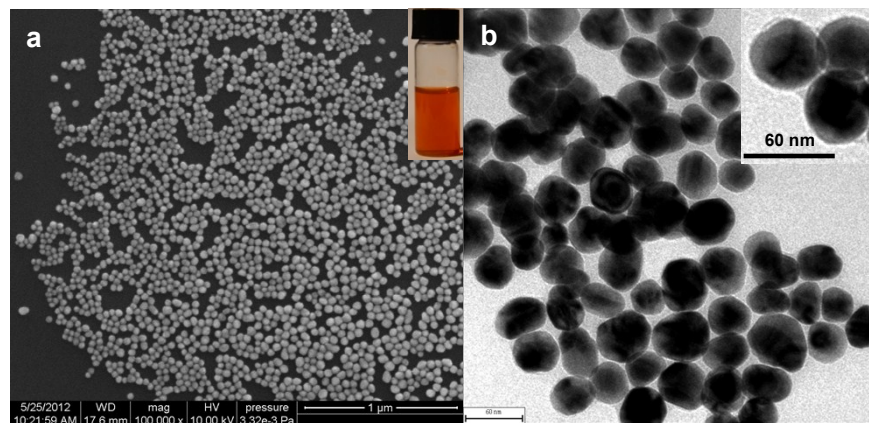

**Figure S1.** (a) SEM image of the Au@AgNPs. The inset was the photograph of the synthesized Au@AgNPs. (b) TEM image of the Au@AgNPs. The illustration was the TEM image of Au@AgNPs with larger magnification.

**Zeta-potential (mv)**

| $C_3N_4$     | Au@Ag        |
|--------------|--------------|
| <b>-35.8</b> | <b>-42.6</b> |

**Table S1.** The Zeta-Potential of the ultrathin g- $C_3N_4$  nanosheets and Au@AgNPs.

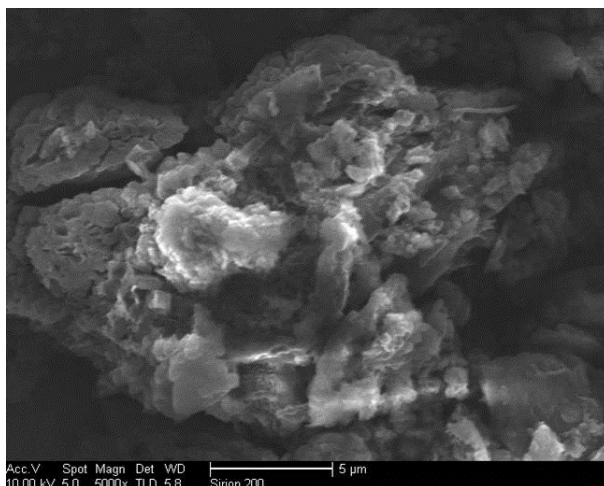

**Figure S2.** SEM image of the bulk g-C<sub>3</sub>N<sub>4</sub>.

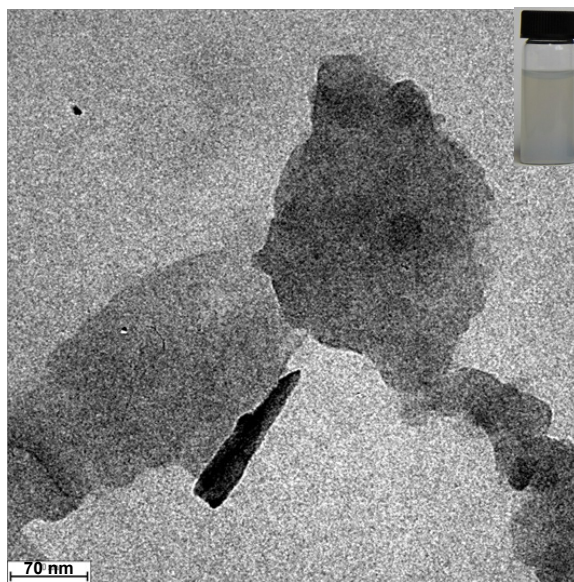

**Figure S3.** TEM image of the ultrathin g-C<sub>3</sub>N<sub>4</sub> nanosheet. The inset was the photograph of the suspension of ultrathin g-C<sub>3</sub>N<sub>4</sub> nanosheets.

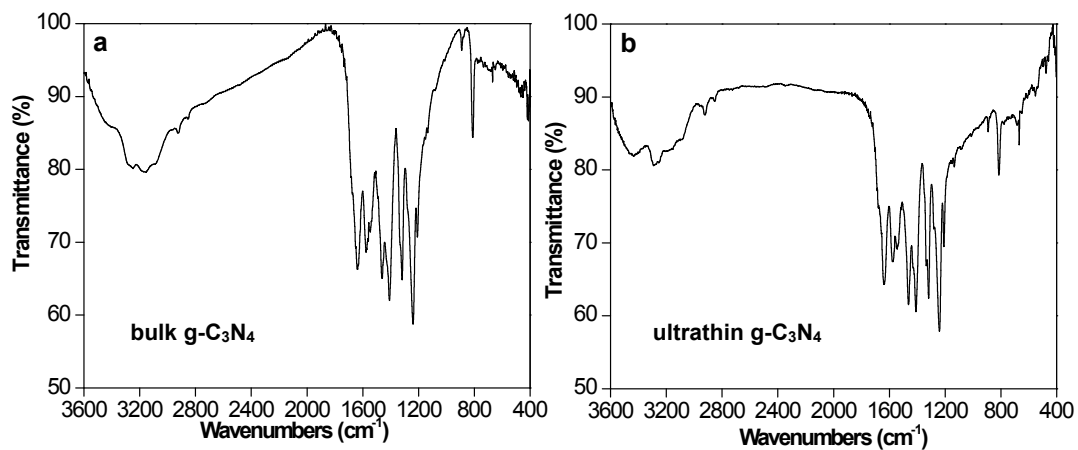

**Figure S4.** The IR spectrum of bulk  $g\text{-C}_3\text{N}_4$  (a) and ultrathin  $g\text{-C}_3\text{N}_4$  nanosheet (b).

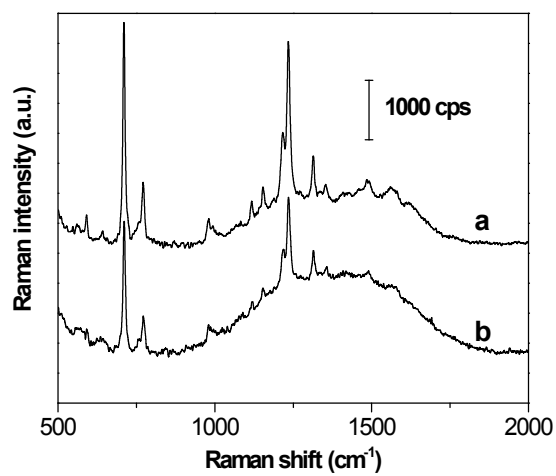

**Figure S5.** Raman spectra of the bulk  $g\text{-C}_3\text{N}_4$  (a) and ultrathin  $g\text{-C}_3\text{N}_4$  nanosheet (b).

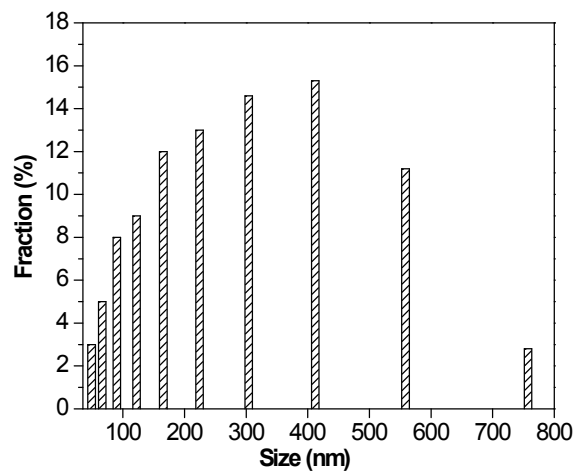

**Figure S6.** The size distribution of the obtained ultrathin g-C<sub>3</sub>N<sub>4</sub> nanosheets.

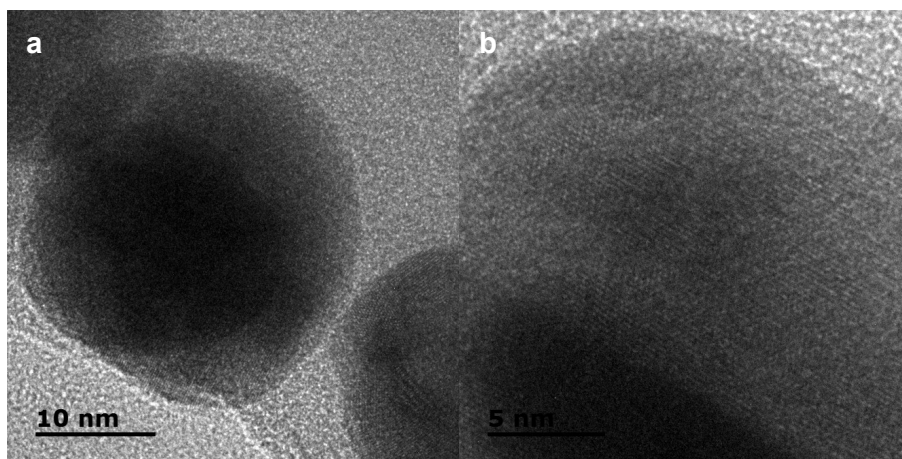

**Figure S7.** (a) High-magnification TEM image of g-C<sub>3</sub>N<sub>4</sub>/Au@Ag NPs nanohybrids, (b) the corresponding HRTEM image of one single Au@Ag NP.

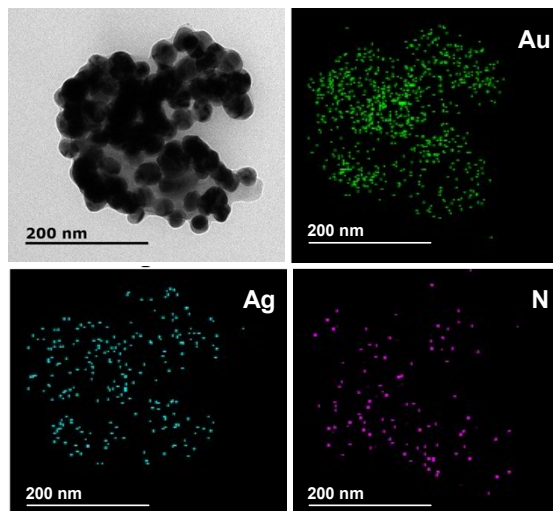

**Figure S8.** TEM image and the corresponding EDS elemental distribution of Au, Ag, N in the g-C<sub>3</sub>N<sub>4</sub>/Au@Ag NPs nanohybrids.

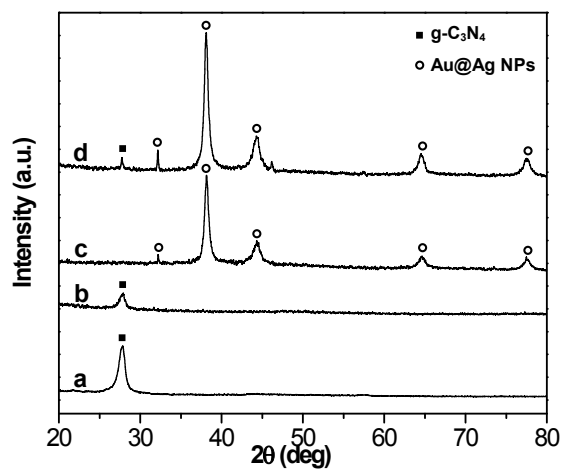

**Figure S9.** XRD patterns of (a) bulk g-C<sub>3</sub>N<sub>4</sub>, (b) ultrathin g-C<sub>3</sub>N<sub>4</sub> nanosheets, (c) Au@Ag NPs and (d) g-C<sub>3</sub>N<sub>4</sub>/Au@Ag NPs nanohybrids.

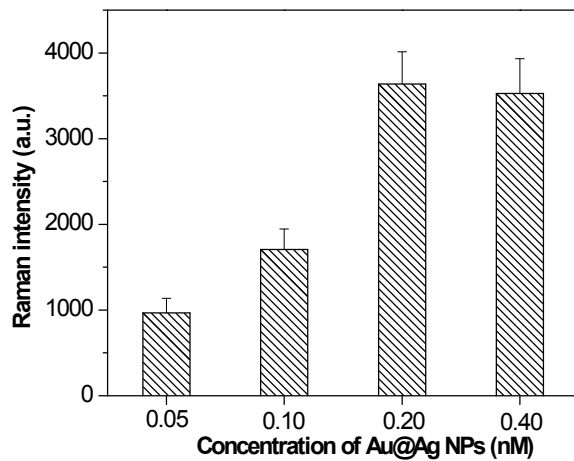

**Figure S10.** The SERS intensity of  $1 \times 10^{-13}$  M R6G molecules at  $1360 \text{ cm}^{-1}$  from g- $\text{C}_3\text{N}_4/\text{Au@AgNPs}$  hybrids with various concentrations Au@AgNPs: 0.05 nM, 0.10 nM, 0.20 nM and 0.40 nM.

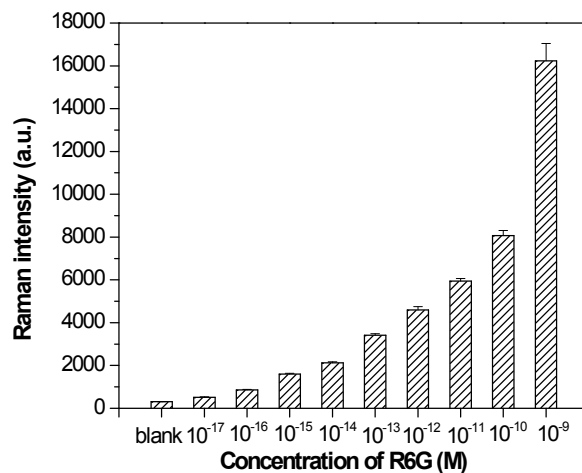

**Figure S11.** Raman intensity of R6G at  $1360 \text{ cm}^{-1}$  with different concentrations from  $1 \times 10^{-17}$  M to  $1 \times 10^{-9}$  M obtained from g- $\text{C}_3\text{N}_4/\text{Au@AgNPs}$  hybrids.

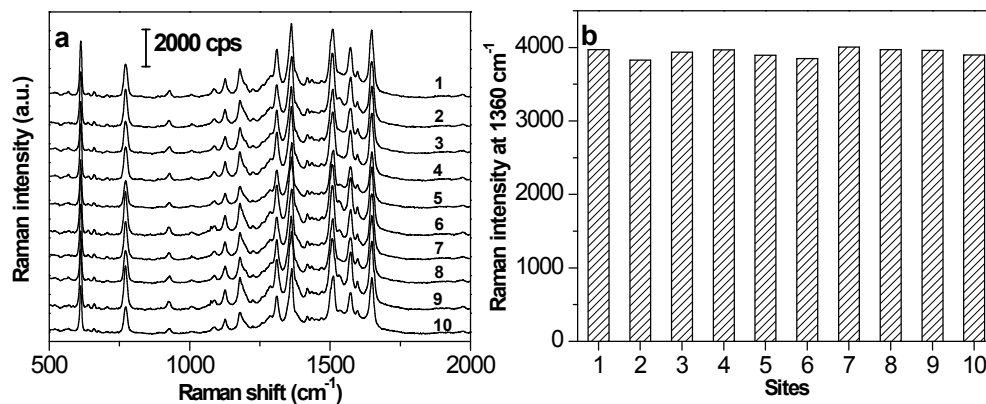

**Figure S12.** (a) SERS spectra of  $1.0 \times 10^{-13}$  M R6G molecules from 10 random sites, (b) the corresponding SERS intensity of R6G (at  $1360 \text{ cm}^{-1}$ ) obtained from the above sites.

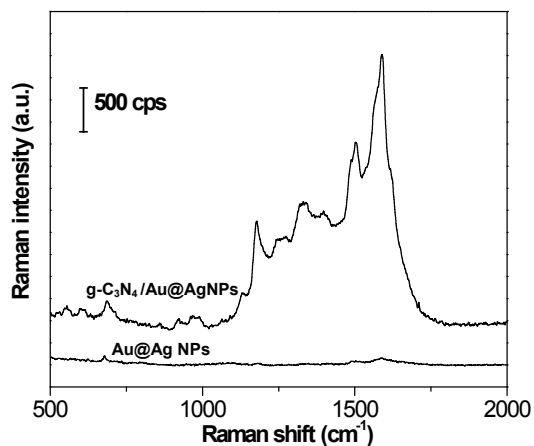

**Figure S13.** SERS spectra of FA with the same concentration (100 nM) obtained from  $\text{g-C}_3\text{N}_4/\text{Au@AgNPs}$  and  $\text{Au@Ag NPs}$ , respectively.



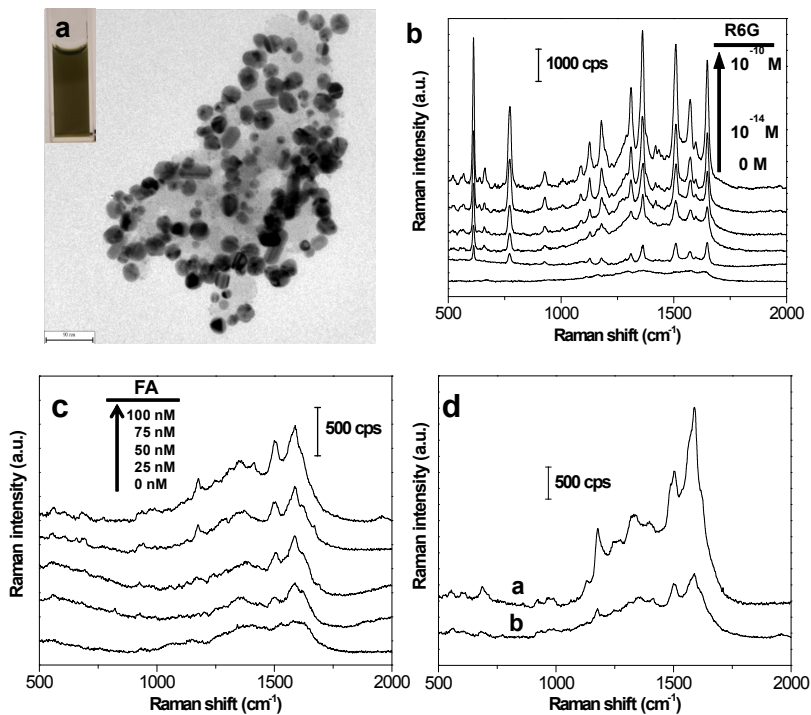

**Figure S14.** (a) TEM image of ultrathin g-C<sub>3</sub>N<sub>4</sub> nanosheets/AgNPs (g-C<sub>3</sub>N<sub>4</sub>/AgNPs) composite structure. The inset was the photograph of above mentioned nanocomposite. (b) SERS spectra of R6G molecules with different concentrations (from  $1 \times 10^{-10}$  M to  $1 \times 10^{-14}$  M) obtained from g-C<sub>3</sub>N<sub>4</sub>/AgNPs. (c) SERS spectra of FA with different concentrations: 0 nM, 25 nM, 50 nM, 75 nM, 100 nM. (d) SERS spectra of FA with the same concentration (100 nM) obtained from g-C<sub>3</sub>N<sub>4</sub>/Au@AgNPs (a) and g-C<sub>3</sub>N<sub>4</sub>/AgNPs (b).

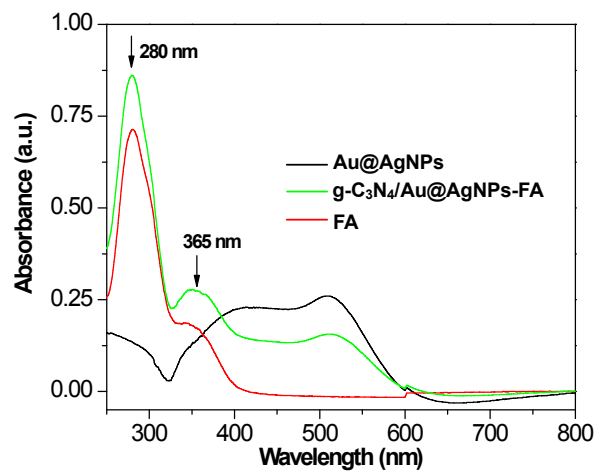

**Figure S15.** UV-vis spectra of FA, Au@AgNPs and g-C<sub>3</sub>N<sub>4</sub>/Au@AgNPs-FA.

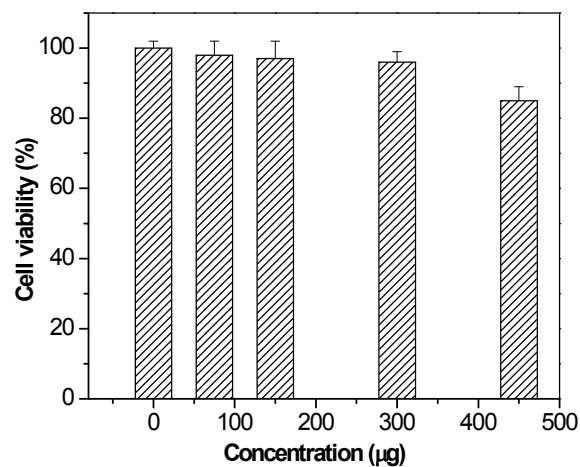

**Figure S16.** Viability of HeLa cells after 24 h of incubation with different concentrations of g-C<sub>3</sub>N<sub>4</sub>/Au@AgNPs-FA.
